# Supplementary material for: Neuronal Damage Induced by Perinatal Asphyxia Is Attenuated by Postinjury Glutaredoxin‐2 Administration
Source: Hindawi journal article supplement (doi:10.1155/2017/4162465), 2017-01-01
Supplement: f1 [file 4162465.f1.pdf]

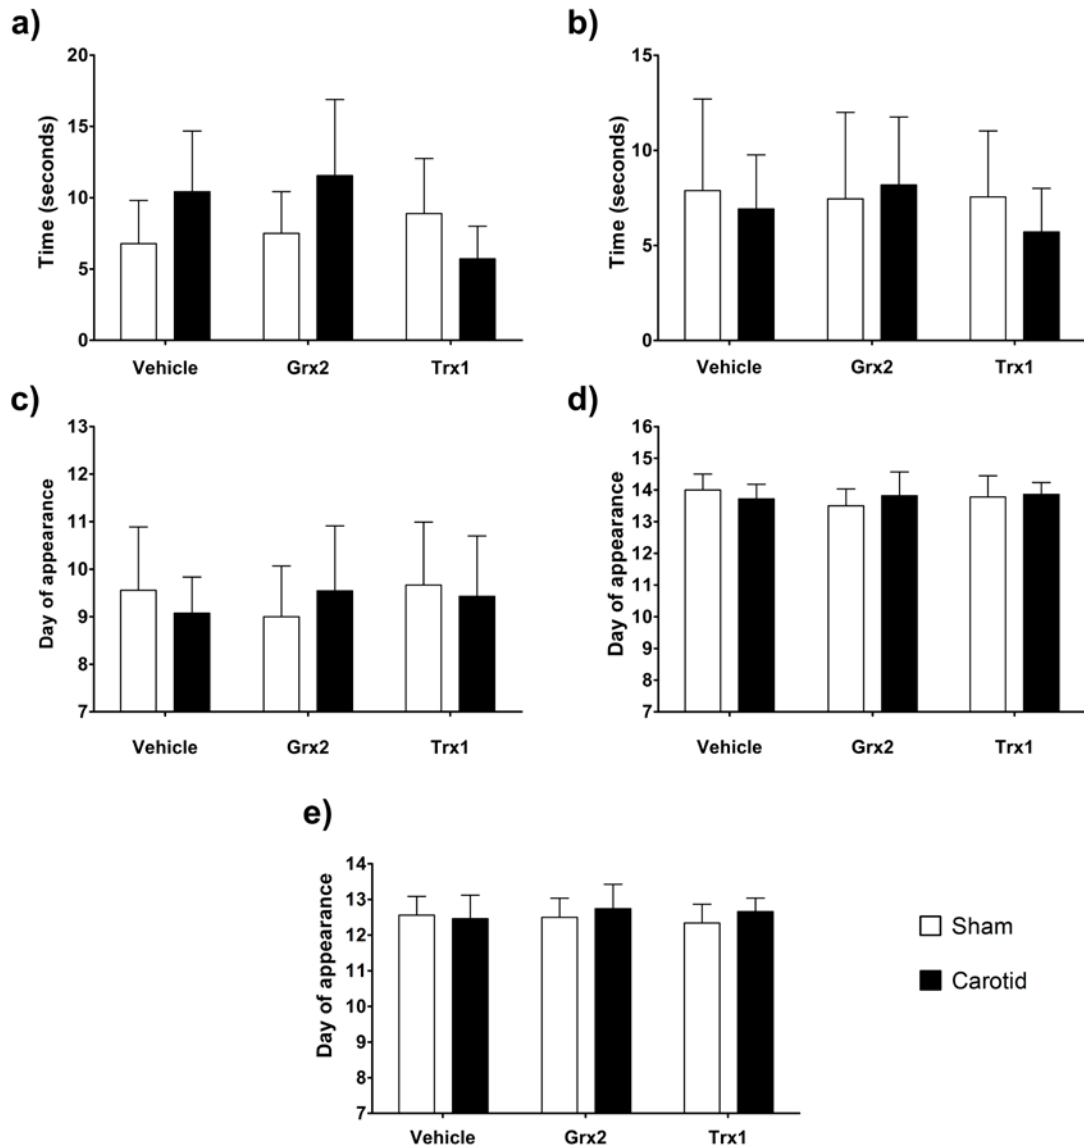

**Supplementary figure 1: Neurobehavioral development after neonatal hypoxia/ischemia episode and administration of saline solution, Grx2 (10 mg/kg) or Trx1 (10 mg/kg) one hour post-injury.** Neurodevelopmental development was evaluated from postnatal day 8 (P8) until ~P19. No statistical differences were detected between the different groups for **a)** negative geotaxis at P10 ( $H = 8.82$ ,  $d.f. = 5$ ,  $p = n.s.$ ), **b)** negative geotaxis at P14 ( $H = 2.31$ ,  $d.f. = 5$ ,  $p = n.s.$ ), **c)** crossed extensor reflex ( $H = 1.76$ ,  $d.f. = 5$ ,  $p = n.s.$ ), **d)** ear unfolding ( $H = 3.82$ ,  $d.f. = 5$ ,  $p = n.s.$ ), and **e)** auditory startle ( $H = 7.66$ ,  $d.f. = 5$ ,  $p = n.s.$ ). All animals presented the surface righting reflex and ear twitching at P8 (data not shown). All statistical analyses were performed by Kruskal-Wallis tests. Bars depict the mean + SEM of 10 pups/group. Sham: pups subjected to sham-surgery at P7; Carotid: pups subjected to right common carotid artery ligation followed by 3 min exposure to 100 % nitrogen at P7; Grx2: mouse recombinant glutaredoxin 2 treatment (10 mg/kg) one hour post-injury; Trx1: human recombinant thioredoxin 1 treatment (10 mg/kg) one hour post-injury.
